# Accelerated Loss of Skeletal Muscle Strength in Older Adults With Type 2 Diabetes

## The Health, Aging, and Body Composition Study

SEOK WON PARK, MD, DRPH<sup>1,2</sup>  
BRET H. GOODPASTER, PHD<sup>3</sup>  
ELSA S. STROTMEYER, PHD<sup>2</sup>  
LEWIS H. KULLER, MD, DRPH<sup>2</sup>  
ROBERT BROUDEAU, PHD<sup>2</sup>  
CANDACE KAMMERER, PHD<sup>4</sup>  
NATHALIE DE REKENEIRE, MD<sup>5</sup>

TAMARA B. HARRIS, MD<sup>6</sup>  
ANN V. SCHWARTZ, PHD<sup>7</sup>  
FRANCES A. TYLAVSKY, PHD<sup>8</sup>  
YONG-WOOK CHO, MD<sup>1</sup>  
ANNE B. NEWMAN, MD, MPH<sup>2</sup>  
FOR THE HEALTH, AGING, AND BODY  
COMPOSITION STUDY

**OBJECTIVE** — It has been shown that adults with either long-standing type 1 or type 2 diabetes had lower skeletal muscle strength than nondiabetic adults in cross-sectional studies. The aim of the study was to investigate longitudinal changes of muscle mass and strength in community-dwelling older adults with and without type 2 diabetes.

**RESEARCH DESIGN AND METHODS** — We examined leg and arm muscle mass and strength at baseline and 3 years later in 1,840 older adults aged 70–79 years in the Health, Aging, and Body Composition Study. Regional muscle mass was measured by dual energy X-ray absorptiometry, and muscle strength was measured using isokinetic and isometric dynamometers.

**RESULTS** — Older adults with type 2 diabetes ( $n = 305$ ) showed greater declines in the leg muscle mass ( $-0.29 \pm 0.03$  vs.  $-0.23 \pm 0.01$  kg,  $P < 0.05$ ) and strength ( $-16.5 \pm 1.2$  vs.  $-12.4 \pm 0.5$  Nm,  $P = 0.001$ ) compared with older adults without diabetes. Leg muscle quality, expressed as maximal strength per unit of muscle mass (Newton meters per kilogram), also declined more rapidly in older adults with diabetes ( $-1.6 \pm 0.2$  vs.  $-1.2 \pm 0.1$  Nm/kg,  $P < 0.05$ ). Changes in arm muscle strength and quality were not different between those with and without diabetes. Rapid declines in leg muscle strength and quality were attenuated but remained significant after controlling for demographics, body composition, physical activity, combined chronic diseases, interleukin-6, and tumor necrosis factor- $\alpha$ .

**CONCLUSIONS** — In older adults, type 2 diabetes is associated with accelerated loss of leg muscle strength and quality.

*Diabetes Care* 30:1507–1512, 2007

From the <sup>1</sup>Department of Internal Medicine, Pochon CHA University, Pochon, Korea; the <sup>2</sup>Department of Epidemiology, University of Pittsburgh, Pittsburgh, Pennsylvania; the <sup>3</sup>Department of Medicine, University of Pittsburgh, Pittsburgh, Pennsylvania; the <sup>4</sup>Department of Human Genetics, University of Pittsburgh, Pittsburgh, Pennsylvania; the <sup>5</sup>Division of Diabetes Translation, Centers for Disease Control and Prevention, Atlanta, Georgia; the <sup>6</sup>Laboratory for Epidemiology, Demography and Biometry, National Institute on Aging, Bethesda, Maryland; the <sup>7</sup>Department of Epidemiology and Biostatistics, University of California, San Francisco, California; and the <sup>8</sup>Department of Preventive Medicine, University of Tennessee, Memphis, Tennessee.

Address correspondence and reprint requests to Seok Won Park, MD, DrPH, Department of Internal Medicine, Pochon CHA University, 351 Yatap-dong, Sungnam, 463-712, Korea. E-mail: spark@cha.ac.kr. Received for publication 15 December 2006 and accepted in revised form 5 March 2007.

Published ahead of print at <http://care.diabetesjournals.org> on 15 March 2007. DOI: 10.2337/dc06-2537. Additional information for this article can be found in an online appendix at <http://dx.doi.org/10.2337/dc06-2537>.

**Abbreviations:** Health ABC, Health, Aging, and Body Composition Study; IL-6, interleukin-6; TNF- $\alpha$ , tumor necrosis factor- $\alpha$ .

A table elsewhere in this issue shows conventional and Système International (SI) units and conversion factors for many substances.

© 2007 by the American Diabetes Association.

The costs of publication of this article were defrayed in part by the payment of page charges. This article must therefore be hereby marked "advertisement" in accordance with 18 U.S.C. Section 1734 solely to indicate this fact.

In industrialized countries, the major increase in the number of people with diabetes is attributed to the aging of the population (1,2). In older adults, diabetes is associated with a two- to threefold increased risk of injurious falls (3) and physical disability (4–8). Several factors have been identified as contributors to diabetes-related disability including obesity (4,5), coronary heart disease (4,5,7), stroke (4), arthritis (4,5), depression (7), and visual impairments (4,5), but still a large portion of the diabetes-disability relationship is not explained by these factors. Alterations in muscular function in diabetes, which can be a potential pathway, have not yet been explored.

Muscle weakness in diabetes has been considered a rare manifestation associated with severe diabetic neuropathy (9). However, recent studies using quantitative assessments of muscular function showed that skeletal muscle strength, especially in the lower extremity, is generally lower in adults with diabetes than in nondiabetic subjects (10–12). The Health, Aging, and Body Composition Study (Health ABC) was designed to investigate the impact of changes in body composition and health conditions on age-related physiological and functional status among adults from 70 to 79 years of age. In this cohort, we have reported that older adults with type 2 diabetes had lower skeletal muscle strength and quality (12). However, it is still unclear whether lower muscle strength in diabetes is a consequence of diabetes or just a coincidence because previous studies were cross-sectional observations. To address this question, we re-examined knee extensor and hand grip strength and body composition 3 years after the initial examination in the Health ABC Study. We hypothesized that older adults with type 2 diabetes would show a greater decline in skeletal muscle strength and quality than older adults without diabetes.

**RESEARCH DESIGN AND**

**METHODS**— The Health ABC Study included well-functioning, community-dwelling older adults aged 70–79 years. The Health ABC Study was described in detail elsewhere (12). Among 2,618 participants who had completed baseline assessments for skeletal muscle mass and strength, 1,840 (70.3%) were reexamined 3 years later. The reasons for not having follow-up data were death ( $n = 146$ ), development of disability and/or institutionalization ( $n = 302$ ), missed contact ( $n = 77$ ), withdrawal of the participants ( $n = 11$ ), inability to perform a knee strength test ( $n = 191$ ), and missing data on body composition ( $n = 51$ ). All participants provided informed consent before participating in the study. The consent forms and study protocols were approved by the institutional review boards at each field center.

**Diabetes assessment**

Participants were considered to have type 2 diabetes if they had 1) a report of having the diagnosis of diabetes with onset after age 25 and/or 2) current use of oral hypoglycemic medications or insulin, or 3) a fasting plasma glucose concentration  $\geq 7.0$  mmol/l at baseline. Plasma glucose was measured using an automated glucose oxidase reaction (Vitros 950 analyzer; Johnson & Johnson, Rochester, NY), and A1C was measured by an enzymatic method (Bio-Rad, Hercules, CA).

**Body composition**

Lean masses of the upper and lower extremities and the total body were assessed using dual-energy X-ray absorptiometry (QDR 4500, software version 8.21; Hologic, Bedford, MA). The validity and reproducibility of the body composition data in the Health ABC Study may be found elsewhere (13,14). Quality assurance measures included the use of a body composition phantom for calibration and annual assessment for potential site differences or drift over time.

**Strength assessments**

Strength was measured using an isokinetic dynamometer (125 AP; Kin-Com, Chattanooga, TN) for knee extension and isometric dynamometer (Jaymar; JLW Instruments, Chicago, IL) for hand grip strength. For knee extension, maximal voluntary concentric isokinetic torque was assessed in Newton meters at an angular velocity of 60°/s. At least three, but no more than six, maximal efforts were

allowed to produce three overlying curves, and the mean maximal torque was recorded and used for the analysis. The right leg was used unless contraindicated by pain or history of joint replacement. For validation of the knee strength assessments, we performed a reliability study in 63 participants. The interexaminer coefficient of variation (CV) was 4.85% with no significant differences between examiners. The intraparticipant CV was 10.68%, and the CV for combined effect of examiner and participant was 11.73%.

Isometric grip strength was assessed for each hand. Participants with severe hand pain or recent surgery were excluded. The vast majority of participants (96%) who had leg strength testing also had grip strength testing. For these analyses, we used the maximum of the force from two trials for the right upper extremity. A measure of muscle quality (leg-specific torque [Newton meters per kilogram] and arm-specific force [kilograms per kilogram]) was created by taking the ratio of strength to the entire corresponding leg or arm muscle mass in kilograms measured by dual-energy X-ray absorptiometry.

**Other covariates**

Sociodemographic characteristics included age, sex, race, and education. Combined chronic diseases such as coronary heart disease, congestive heart failure, stroke, peripheral artery disease, knee osteoarthritis, depression, and cancer were identified by self-report and confirmed by treatment and medication use. Self-reported poor eyesight was considered as impaired vision. Renal insufficiency was defined by serum creatinine level  $> 1.5$  mg/dl in men and 1.2 mg/dl in women (15). The ankle-arm index was calculated, and subclinical peripheral artery disease was defined by ankle-arm index  $< 0.9$ . Health-related behaviors including smoking, alcohol drinking, and level of physical activity (kilocalories per week) were determined by using a standardized questionnaire (16). Interleukin-6 (IL-6) and tumor necrosis factor- $\alpha$  (TNF- $\alpha$ ) were measured in duplicate using an ultrasensitive enzyme-linked immunosorbent assay (R&D Systems, Minneapolis, MN). The lower limit of detection was  $< 0.10$  pg/ml for IL-6 and 0.18 pg/ml for TNF- $\alpha$ , with CVs of 6.3 and 16.0%, respectively.

**Statistical analyses**

Baseline characteristics of the cohort are presented separately for those with and without diabetes.  $\chi^2$  tests were calculated for categorical variables, and a Student's  $t$  test was used for continuous variables to test for any statistical differences between the two groups. Longitudinal changes of muscle strength and quality were calculated in both absolute terms and relative terms (percent change from baseline). Differences between older adults with and without diabetes were assessed by general linear models controlling for sex, race, age, and clinic site (model 1). Additional adjustments were made for BMI, baseline strength or quality, changes in muscle mass, and physical activity (model 2), plus combined chronic diseases and diabetes-related complications (model 3) and inflammatory cytokines (log-transformed IL-6 and TNF- $\alpha$  in model 4).  $P < 0.05$  was accepted as statistically significant. All of the analyses were performed using SPSS software (version 12.0.0; SPSS, Chicago, IL).

**RESULTS**— Among the 1,840 older adults with complete assessments of baseline and follow-up skeletal muscle mass and strength tests, 305 (16.6%) had type 2 diabetes at baseline. Older adults with type 2 diabetes were more likely to be men and black and to have a lower level of education (Table 1). Those with diabetes had greater body weight, BMI, and total fat mass as well as higher total lean mass than their nondiabetic counterparts. As expected, combined chronic conditions such as coronary heart disease, peripheral artery disease, impaired vision, and renal insufficiency were more prevalent in those with type 2 diabetes. IL-6 and TNF- $\alpha$  levels were significantly higher in older adults with diabetes (Table 1).

Both diabetic and nondiabetic older adults lost significant amounts of initial muscle strength in 3 years. However, older adults with type 2 diabetes lost their knee extensor strength more rapidly than those without diabetes ( $P = 0.001$ ) (Table 2). Older adults with type 2 diabetes also lost greater amounts of leg lean mass than those without diabetes ( $P < 0.05$ ). Furthermore, muscle quality (maximal strength per unit of muscle mass in Newton meters per kilogram) declined more rapidly in older adults with type 2 diabetes ( $P < 0.05$ ). When expressed in relative changes, older adults with type 2 diabetes showed  $\sim 50\%$  more rapid declines in knee extensor strength ( $-9.0$  vs.  $-13.5\%$ ,  $P = 0.002$ ) and muscle

Table 1—Characteristics of participants by baseline diabetes status in the Health ABC Study

|                                          | Without diabetes | With diabetes    | P value* |
|------------------------------------------|------------------|------------------|----------|
| <i>n</i>                                 | 1,535            | 305              |          |
| <b>Sociodemographic</b>                  |                  |                  |          |
| Age (years)                              | 73.4 ± 2.8       | 73.5 ± 2.7       | 0.772    |
| Men (%)                                  | 47.7             | 59.1             | <0.001   |
| Blacks (%)                               | 32.7             | 51.9             | <0.001   |
| Education <12 years (%)                  | 19.8             | 30.9             | <0.001   |
| <b>Anthropometric (body composition)</b> |                  |                  |          |
| Height (cm)                              | 166.6 ± 9.2      | 167.0 ± 9.3      | 0.312    |
| Weight (kg)                              | 75.2 ± 14.4      | 81.0 ± 14.1      | <0.001   |
| BMI (kg/m <sup>2</sup> )                 | 27.1 ± 4.4       | 29.0 ± 4.4       | <0.001   |
| Total body fat (%)                       | 33.6 ± 7.6       | 34.3 ± 7.4       | 0.050    |
| Total fat mass (kg)                      | 25.5 ± 8.0       | 27.9 ± 8.2       | <0.001   |
| Total lean mass (kg)                     | 47.5 ± 10.1      | 50.7 ± 9.9       | <0.001   |
| <b>Chronic diseases (%)</b>              |                  |                  |          |
| Coronary heart disease                   | 15.2             | 23.7             | <0.001   |
| Congestive heart failure                 | 1.5              | 2.9              | 0.094    |
| Stroke                                   | 1.8              | 1.9              | 0.860    |
| PAD                                      | 3.0              | 5.8              | 0.014    |
| Knee osteoarthritis                      | 8.4              | 6.8              | 0.347    |
| Depression                               | 11.6             | 9.7              | 0.337    |
| Cancer                                   | 21.0             | 16.6             | 0.079    |
| Impaired vision                          | 16.7             | 25.7             | <0.001   |
| Renal insufficiency                      | 6.0              | 11.5             | 0.001    |
| Subclinical PAD†                         | 9.5              | 19.1             | <0.001   |
| <b>Behavioral factors</b>                |                  |                  |          |
| Current smoking (%)                      | 8.5              | 6.5              | 0.243    |
| Alcohol drinking (%)                     | 55.4             | 38.3             | <0.001   |
| Physical activity (kcal/week)‡           | 548 (119–1,446)  | 403 (57–1,235)   | 0.024    |
| <b>Biochemical</b>                       |                  |                  |          |
| Fasting glucose (mmol/l)                 | 5.2 ± 0.5        | 8.4 ± 2.9        | <0.001   |
| A1C (%)                                  | 6.0 ± 0.5        | 7.9 ± 1.6        | <0.001   |
| IL-6 (pg/ml)‡                            | 1.63 (1.12–2.44) | 2.16 (1.47–3.08) | <0.001   |
| TNF-α (pg/ml)‡                           | 3.03 (2.35–3.86) | 3.41 (2.57–4.37) | <0.001   |

Data are means ± SD, proportions, or median (interquartile range). \*P values are from age/sex/race-adjusted logistic regression or linear models comparing participants with and without diabetes. †Subclinical peripheral artery disease (PAD) was defined as ankle-arm index <0.9. ‡Wilcoxon rank-sum test for comparison of medians.

quality (−6.2 vs. −10.0%,  $P = 0.01$ ) in 3 years than those without diabetes. However, the changes in hand grip strength and arm muscle quality were not different between those with and without diabetes although older adults with diabetes lost greater amounts of arm muscle mass (Table 2). There was no indication of an interaction effect ( $P < 0.10$ ) of sex or race with diabetes on the changes in muscle strength or muscle quality.

Table 3 presents the changes in knee extensor strength and muscle quality with controls for potential confounders. A greater decline of knee extensor strength in older adults with type 2 diabetes was not changed by adjustments for sex, race, age, clinic site, BMI, baseline strength,

changes in leg muscle mass, and physical activity (models 1 and 2). The association of diabetes and loss of knee extensor strength was slightly attenuated by additional adjustments for combined chronic diseases and inflammatory cytokines (models 3 and 4).

A greater decline of leg muscle quality in older adults with type 2 diabetes was also evident, even after adjustments for demographics, BMI, baseline muscle quality, changes in leg lean mass, and physical activity ( $P = 0.001$ , model 2). Further adjustments for combined chronic diseases and inflammatory cytokines attenuated the association of diabetes and declines in muscle quality. However, the greater declines in muscle

strength and quality in older adults with type 2 diabetes remained significant throughout the adjustment models (Table 3).

**CONCLUSIONS**— In this study, older adults with type 2 diabetes lost 13.5% of their knee extensor strength, whereas those without diabetes lost 9.0% of initial strength in 3 years. An ~50% more rapid decline in the knee extensor strength in older adults with diabetes was not accounted for by a greater loss of leg muscle mass. Muscle quality also declined more rapidly in older adults with type 2 diabetes, suggesting that diabetes may result in functional impairments in muscular function of the lower extremities, not necessarily accompanied by loss of muscle mass.

Sarcopenia, a status of decreased skeletal muscle mass, is commonly observed in older adults as a result of age-related loss of muscle mass (17–21). In general, it is frequently accompanied by lower skeletal muscle strength. However, determinants or risk factors for sarcopenia and low muscle strength in older adults have not been well identified (22). This is the first epidemiological study showing that type 2 diabetes is associated with rapid loss of skeletal muscle mass and strength in older adults. It confirms the previous cross-sectional finding of lower muscle strength in individuals with diabetes (10–12). It is also consistent with the finding of Andreassen et al. (23) who showed a rapid decline in ankle strength in patients with symptomatic diabetic neuropathy. The findings of this longitudinal study strongly suggest that low muscle strength in adults with type 2 diabetes is a consequence of rather than just a coincidence with type 2 diabetes.

We found discordance between the upper and lower extremities for diabetes and changes in muscle strength. A relative preservation of upper extremity strength has been observed in the process of aging (21,24). Our findings are, in fact, consistent with previous cross-sectional studies showing decreased skeletal muscle strength at the ankle and knee but not at the wrist and elbow in patients with type 2 diabetes (10). Andersen et al. (11) reported that upper extremity strength was preserved even in long-standing type 1 diabetic patients. They also found that muscle strength was related to the presence and severity of peripheral neuropathy in both type 1 and type 2 diabetic patients (10,11). It is well known that the

Table 2—Three-year changes in skeletal muscle strength, mass, and quality by baseline diabetes status in the Health ABC Study

|                         | Baseline    | Without diabetes<br>36 months | Change        | Baseline     | With diabetes<br>36 months | Change        | P value* |
|-------------------------|-------------|-------------------------------|---------------|--------------|----------------------------|---------------|----------|
| n                       |             | 1,535                         |               |              | 305                        |               |          |
| Knee extensor           |             |                               |               |              |                            |               |          |
| Maximal torque (Nm)     | 109.1 ± 0.7 | 96.8 ± 0.7                    | −12.4 ± 0.5†  | 111.3 ± 1.5  | 94.8 ± 1.5                 | −16.5 ± 1.2‡  | 0.001    |
| Leg lean mass (kg)      | 7.52 ± 0.03 | 7.29 ± 0.03                   | −0.23 ± 0.01‡ | 7.96 ± 0.07† | 7.66 ± 0.07†               | −0.29 ± 0.03‡ | 0.035    |
| Specific torque (Nm/kg) | 14.4 ± 0.1  | 13.2 ± 0.1                    | −1.2 ± 0.1‡   | 14.0 ± 0.2†  | 12.4 ± 0.2†                | −1.6 ± 0.2‡   | 0.034    |
| Hand grip               |             |                               |               |              |                            |               |          |
| Maximal force (kg)      | 32.6 ± 0.2  | 31.3 ± 0.2                    | −1.3 ± 0.1‡   | 32.1 ± 0.4   | 30.8 ± 0.4                 | −1.3 ± 0.3‡   | 0.964    |
| Arm lean mass (kg)      | 2.75 ± 0.01 | 2.70 ± 0.01                   | −0.06 ± 0.01‡ | 2.92 ± 0.03† | 2.83 ± 0.03†               | −0.08 ± 0.01‡ | 0.025    |
| Specific force (kg/kg)  | 12.0 ± 0.1  | 11.8 ± 0.1                    | −0.2 ± 0.1‡   | 11.2 ± 0.1†  | 11.0 ± 0.1†                | −0.2 ± 0.1    | 0.757    |

Data are adjusted means ± SE from linear models controlling for age, sex, race, and clinic site. \*P values for comparison of 3-year changes between two groups. †P < 0.01 versus those without diabetes at the same time period. ‡P < 0.001 between baseline and 36 months within the same group.

lower extremities are predominantly involved in diabetic neuropathy presumably because of a length-dependent degeneration of nerve fibers (25,26). If neuropathy is a factor, skeletal muscle function is more likely to be affected in the lower extremities than in the upper extremities.

The exclusion of many participants for follow-up knee extensor strength test may have potentially biased the results to the null because proportionally more subjects with diabetes were excluded because of high mortality and other reasons (see Table 1 of the online appendix, available at <http://dx.doi.org/10.2337/dc06-2537>). We identified 47 participants with diabetes and 181 without diabetes who were excluded from the knee strength test but had the grip strength test at the fol-

low-up examination. Among them, declines in hand grip strength were greater in older adults with diabetes than in those without diabetes ( $-3.3 \pm 6.7$  vs.  $-1.1 \pm 6.2$  kg,  $P < 0.05$ ), suggesting that strict criteria for knee strength testing might select stronger individuals and actually obscure the true declines in muscle strength, particularly in those with diabetes (see Table 2 of the online appendix).

Lower extremity strength is essential for maintaining basic physical function, especially mobility such as walking and climbing stairs. It is well known that lower knee extensor strength is associated with an increased risk of incident mobility limitations (27–29). Although it is unclear whether there is a certain threshold level of leg strength to maintain physical function, lower muscle strength is defi-

nately a risk factor for physical disability, independent of lower muscle mass itself (29).

Several studies suggested that the combination of sarcopenia and obesity (“sarcopenic obesity”) was more strongly associated with disability than either body composition type alone (30,31). It is possible that the rapid decline in muscle strength in older adults with type 2 diabetes may be associated with sarcopenic obesity. However, to our knowledge there is no study examining the changes in muscle strength in relation to sarcopenic obesity.

The mechanisms for the rapid loss of skeletal muscle strength, in older adults with diabetes are not known. Neuropathic processes involving motor neurons could affect muscle strength, as evidenced by the close association of muscle strength and severity of diabetic neuropathy in the previous cross-sectional observations (10,11). Electrophysiological studies showed that muscle strength in diabetic patients correlated with fiber density and amplitude of the macromotor unit potential, suggesting incomplete reinnervation after axonal loss (32). Longitudinal studies suggest an average loss of compound muscle action potential amplitude at a rate of ~3%/year in patients with type 2 diabetes over a 10-year period (33). Further research should identify the role of the decrease in motor amplitudes on skeletal muscle strength and quality in subjects with diabetes.

In our study, adjustments for comorbid conditions such as cardiovascular disease, stroke, congestive heart failure, peripheral arterial disease, depression, impaired vision, and renal insufficiency slightly attenuated the declines in muscle strength. These results suggest that

Table 3—Adjusted 3-year changes in knee extensor strength and muscle quality by baseline diabetes status in the Health ABC Study

|                                         | Without diabetes | With diabetes | P value |
|-----------------------------------------|------------------|---------------|---------|
| n                                       | 1,535            | 305           |         |
| Muscle strength (maximal torque, Nm)    |                  |               |         |
| Model 1                                 | −12.4 ± 0.5      | −16.5 ± 1.2   | 0.001   |
| Model 2                                 | −12.5 ± 0.5      | −16.2 ± 1.1   | 0.001   |
| Model 3                                 | −12.5 ± 0.5      | −15.7 ± 1.1   | 0.008   |
| Model 4                                 | −12.7 ± 0.5      | −15.6 ± 1.2   | 0.026   |
| Muscle quality (specific torque, Nm/kg) |                  |               |         |
| Model 1                                 | −1.22 ± 0.07     | −1.57 ± 0.15  | 0.034   |
| Model 2                                 | −1.20 ± 0.06     | −1.69 ± 0.14  | 0.001   |
| Model 3                                 | −1.21 ± 0.06     | −1.64 ± 0.14  | 0.006   |
| Model 4                                 | −1.24 ± 0.06     | −1.64 ± 0.15  | 0.018   |

Data are adjusted means ± SE. Model 1: adjusted for sex, race, age, and clinic site. Model 2: additionally adjusted for BMI, baseline strength or quality, changes in leg lean mass, and physical activity. Model 3: additionally adjusted for coronary heart disease, stroke, congestive heart failure, peripheral artery disease, knee osteoarthritis, cancer, depression, impaired vision, renal insufficiency, and subclinical peripheral artery disease (ankle arm index <0.9). Model 4: additionally adjusted for cytokines (log-transformed IL-6 and TNF-α).



chronic complications of diabetes have a limited role in declines in skeletal muscle strength in older adults with diabetes. However, we had no reliable assessment of nerve function in our study at baseline. It is possible that declines in muscle function may indeed be the result of diabetic neuropathy (23).

Another potential mechanism is increased levels of inflammatory cytokines in subjects with diabetes. It has been reported that systemic inflammatory cytokines such as TNF- $\alpha$  and IL-6 have detrimental effects on muscle mass, strength, and physical performance in older adults (34,35). In our study, rapid declines in muscle strength and quality in older adults with diabetes are attenuated, albeit still significant, after adjusting for IL-6 and TNF- $\alpha$ . These findings may suggest a potential role of inflammatory cytokines on the muscular function in diabetes.

Our study has several limitations. The study participants were well-functioning, community-dwelling older adults who were relatively healthier than other individuals in the typical population of the same age. There were many dropouts, and only ~70% of participants completed follow-up assessments. However, we believe that the loss to follow-up may produce an underestimation of the true decline in muscle function in those with diabetes (see Tables 1 and 2 of the online appendix). The questionnaire to assess physical activity in the Health ABC Study has not been validated in older diabetic subjects. It may not be sensitive enough to detect the influence of different physical activity level on the changes in muscle strength and quality in our study. We also lacked information about neuropathy at baseline, which would be related with muscular function in those with type 2 diabetes.

In summary, the present study demonstrates an accelerated loss of knee extensor strength and quality in older adults with type 2 diabetes.

**Acknowledgments**—This study was supported by National Institute on Aging Contracts N01-AG-6-2101, N01-AG-6-2103, and N01-AG-6-2106 and in part by the Intramural Research program of the National Institutes of Health, National Institute on Aging. Parts of this study were presented orally at the 65th annual meeting of the American Diabetes Association, San Diego, California, 10–14 June 2005.

## References

- Wild S, Roglic G, Green A, Sicree R, King H: Global prevalence of diabetes: estimates for the year 2000 and projections for 2030. *Diabetes Care* 27:1047–1053, 2004
- Boyle JP, Honeycutt AA, Narayan KM, Hoerger TJ, Geiss LS, Chen H, Thompson TJ: Projection of diabetes burden through 2050: impact of changing demography and disease prevalence in the U.S. *Diabetes Care* 24:1936–1940, 2001
- Miller DK, Lui LY, Perry HM, Kaiser FE, Morley JE: Reported and measured physical functioning in older inner-city diabetic African Americans. *J Gerontol A Biol Sci Med Sci* 54:M230–M236, 1999
- Gregg EW, Beckles GL, Williamson DF, Leveille SG, Langlois JA, Engelgau MM, Narayan KM: Diabetes and physical disability among U.S. adults. *Diabetes Care* 23:1272–1277, 2000
- Gregg EW, Mangione CM, Cauley JA, Thompson TJ, Schwartz AV, Ensrud KE, Nevitt MC: Diabetes and incidence of functional disability in older women. *Diabetes Care* 25:61–67, 2002
- Ryerson B, Tierney EF, Thompson TJ, Engelgau MM, Wang J, Gregg EW, Geiss LS: Excess physical limitations among adults with diabetes in the U.S. population, 1997–1999. *Diabetes Care* 26:206–210, 2003
- De Rekeneire N, Resnick HE, Schwartz AV, Shorr RI, Kuller LH, Simonsick EM, Vellas B, Harris TB: Diabetes is associated with subclinical functional limitation in nondisabled older individuals: The Health, Aging, and Body Composition study. *Diabetes Care* 26:3257–3263, 2003
- Von Korff M, Katon W, Lin EH, Simon G, Ciechanowski P, Ludman E, Oliver M, Rutter C, Young B: Work disability among individuals with diabetes. *Diabetes Care* 28:1326–1332, 2005
- Dyck PJ, Kratz KM, Karnes JL, Litchy WJ, Klein R, Pach JM, Wilson DM, O'Brien PC, Melton LJ, Service FJ: The prevalence by staged severity of various types of diabetic neuropathy, retinopathy, and nephropathy in a population-based cohort: the Rochester Diabetic Neuropathy Study. *Neurology* 43:817–824, 1993
- Andersen H, Nielsen S, Mogensen CE, Jakobsen J: Muscle strength in type 2 diabetes. *Diabetes* 53:1543–1548, 2004
- Andersen H, Poulsen PL, Mogensen CE, Jakobsen J: Isokinetic muscle strength in long-term IDDM patients in relation to diabetic complications. *Diabetes* 45:440–445, 1996
- Park SW, Goodpaster BH, Strotmeyer ES, De Rekeneire N, Harris TB, Schwartz AV, Tylavsky FA, Newman AB: Decreased muscle strength and quality in older adults with type 2 diabetes: the Health, Aging and Body Composition Study. *Diabetes* 55:1813–1818, 2006
- Visser M, Fuerst T, Lang T, Salamone L, Harris TB: Validity of fan beam dual-energy x-ray absorptiometry for measuring fat-free and leg muscle mass. *J Appl Physiol* 87:1513–1520, 1999
- Tylavsky FA, Lohman TG, Dockrell M, Lang T, Schoeller DA, Wan JY, Fuerst T, Cauley JA, Nevitt M, Harris TB: Comparison of the effectiveness of 2 dual-energy x-ray absorptiometers with that of total body water and computed tomography in assessing changes in body composition during weight change. *Am J Clin Nutr* 77:356–363, 2003
- Couchoud C, Pozet N, Labeeuw M, Pouteil-Noble C: Screening early renal failure: cut-off values for serum creatinine as an indicator of renal impairment. *Kidney Int* 55:1878–1884, 1999
- Brach JS, Simonsick EM, Kritchevsky S, Yaffe K, Newman AB: The association between physical function and lifestyle activity and exercise in the Health, Aging and Body Composition Study. *J Am Geriatr Soc* 52:502–509, 2004
- Evans WJ: What is sarcopenia? *J Gerontol A Biol Sci Med Sci* 50:5–8, 1995
- Harris TB: Muscle mass and strength: relation to function in population studies. *J Nutr* 127(5 Suppl.):1004–1006, 1997
- Metter EJ, Lynch N, Conwit R, Lindle R, Tobin J, Hurley B: Muscle quality and age: cross-sectional and longitudinal comparisons. *J Gerontol* 54:B207–218, 1999
- Roubenoff R, Hughes VA: Sarcopenia; current concepts. *J Gerontol* 55:M716–M722, 2000
- Newman AB, Haggerty CL, Goodpaster B, Harris TB, Kritchevsky SB, Nevitt M, Miles TP, Visser M: Strength and muscle quality in a well-functioning cohort of older adults: the Health, Aging, and Body Composition Study. *J Am Geriatr Soc* 51:323–330, 2003
- Goodpaster BH, Park SW, Harris TB, Kritchevsky SB, Nevitt M, Schwartz AV, Simonsick EM, Tylavsky FA, Visser M, Newman AB: The loss of skeletal muscle strength, mass and quality in older adults: the Health, Aging and Body Composition Study. *J Gerontol* 61A:1059–1064, 2006
- Andreassen CS, Jakobsen J, Andersen H: Muscle weakness: a progressive late complication in diabetic distal symmetric polyneuropathy. *Diabetes* 55:806–812, 2006
- Frontera WR, Hughes VA, Fielding RA, Fiatarone MA, Evans WJ, Roubenoff R: Aging of skeletal muscle: a 12-yr longitudinal study. *J Appl Physiol* 88:1321–1326, 2000
- Said G, Goulon-Goeau C, Slama G, Tchobroutsky G: Severe early-onset polyneuropathy in insulin-dependent diabetes mellitus: a clinical and pathological study. *N Engl J Med* 326:1257–1263, 1992
- Boulton AJM, Arezzo JC, Malik RA, So-

- senko JM: Diabetic somatic neuropathies. *Diabetes Care* 27:1458–1486, 2004
27. Visser M, Deeg DJH, Lips P, Harris T, Bouter LM: Skeletal muscle mass and muscle strength in relation to lower-extremity performance in older men and women. *J Am Geriatr Soc* 48:381–386, 2000
28. Landers KA, Hunter GR, Wetzstein CJ, Bamman MM, Weinsier RL: The interrelationship among muscle mass, strength, and the ability to perform physical tasks of daily living in younger and older women. *J Gerontol* 56:B443–B448, 2001
29. Visser M, Goodpaster BH, Kritchevsky SB, Newman AB, Nevitt MC, Rubin SM, Simonsick EM, Harris TB, Health ABC Study: Muscle mass, muscle strength, and muscle fat infiltration as predictors of incident mobility limitations in well-functioning older adults. *J Gerontol* 60A:324–333, 2005
30. Baumgartner RN: Body composition in healthy aging. *Ann NY Acad Sci* 904:437–448, 2000
31. Baumgartner RN, Wayne SJ, Waters DL, Janssen I, Gallagher D, Morley JE: Sarcopenic obesity predicts instrumental activities of daily living disability in the elderly. *Obes Res* 12:1995–2004, 2004
32. Andersen H, Stalberg E, Gjerstad MD, Jakobsen J: Association of muscle strength and electrophysiological measures of re-innervation in diabetic neuropathy. *Muscle Nerve* 21:1647–1654, 1998
33. Partanen J, Niskanen L, Lehtinen J, Mer-  
vaala E, Siitonen O, Uusitupa M: Natural history of peripheral neuropathy in patients with non-insulin-dependent diabetes mellitus. *N Engl J Med* 333:89–94, 1995
34. Visser M, Pahor M, Taaffe DR, Goodpaster BH, Simonsick EM, Newman AB, Nevitt M, Harris TB: Relationship of interleukin-6 and tumor necrosis factor- $\alpha$  with muscle mass and muscle strength in elderly men and women: the Health ABC Study. *J Gerontol* 57:M326–M332, 2002
35. Cesari M, Penninx BW, Pahor M, Lauretani F, Corsi AM, Williams GR, Guralnik JM, Ferrucci L: Inflammatory markers and physical performance in older persons: the InCHIANTI Study. *J Gerontol* 59:242–248, 2004
